# Supplementary material for: Flowthrough pretreatment with very dilute acid provides insights into high lignin contribution to biomass recalcitrance
Source: PubMed Central journal article supplement (PMC5103384; doi:10.1186/s13068-016-0660-5), 2016-11-10
Supplement: 13068_2016_660_MOESM1_ESM.pdf [file 13068_2016_660_MOESM1_ESM.pdf]

**Flowthrough pretreatment with very dilute acid provides insights into high lignin contribution to biomass recalcitrance**

**Material Balances**

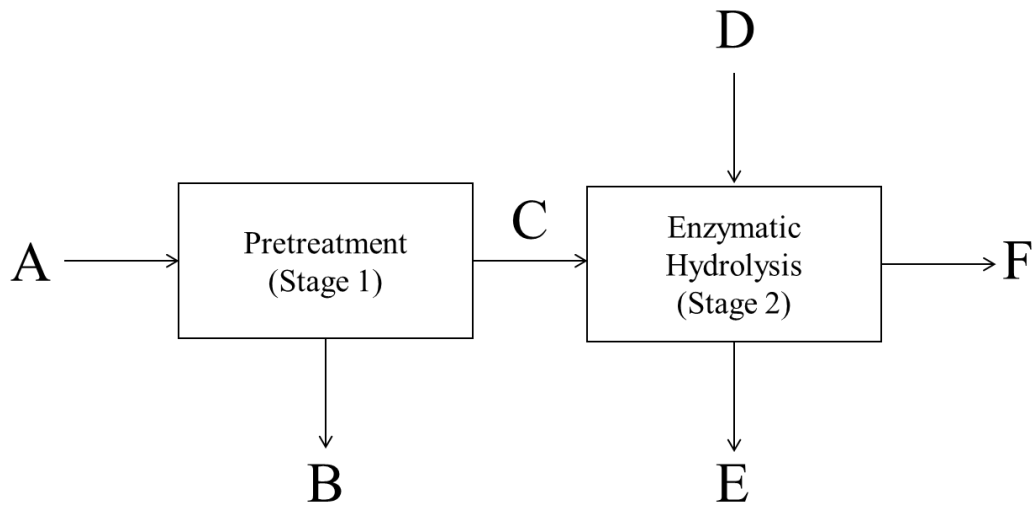

100 kg biomass basis

Enzyme after reaction assumed to remain in biomass residue.

Table 1. Materials in Stream A (in kilograms)

| Condition               | Mass of Solid | Glucan in Raw | Xylan in Raw | Lignin in Raw | Others in Raw | Acid to Stage 1 | Water To Stage 1 |
|-------------------------|---------------|---------------|--------------|---------------|---------------|-----------------|------------------|
| No pretreatment         | 100           | 45.75         | 17.57        | 28.10         | 8.58          | 0               | 0                |
| 140°C 192 min Batch LHW | 100           | 45.75         | 17.57        | 28.10         | 8.58          | 0               | 4900             |
| 180°C 12 min Batch LHW  | 100           | 45.75         | 17.57        | 28.10         | 8.58          | 0               | 4900             |
| 140°C 192 min FT LHW    | 100           | 45.75         | 17.57        | 28.10         | 8.58          | 0               | 396000           |
| 180°C 12 min FT LHW     | 100           | 45.75         | 17.57        | 28.10         | 8.58          | 0               | 36000            |
| 140°C 192 min Batch EDA | 100           | 45.75         | 17.57        | 28.10         | 8.58          | 2.45            | 4898             |
| 180°C 12 min Batch EDA  | 100           | 45.75         | 17.57        | 28.10         | 8.58          | 2.45            | 4898             |
| 140°C 192 min FT EDA    | 100           | 45.75         | 17.57        | 28.10         | 8.58          | 198             | 395802           |
| 180°C 12 min FT EDA     | 100           | 45.75         | 17.57        | 28.10         | 8.58          | 18              | 35982            |

Table 2. Materials in stream B (in kilograms)

| Condition               | Total Mass of Liquid | Glucose in Pretreatment Liquor | Cellobiose in Pretreatment Liquor | Glucooligomers in Pretreatment Liquor | Xylose in Pretreatment Liquor | Xylooligomers in Pretreatment Liquor | Solublized Lignin in Pretreatment Liquor | Others in Pretreatment Liquor |
|-------------------------|----------------------|--------------------------------|-----------------------------------|---------------------------------------|-------------------------------|--------------------------------------|------------------------------------------|-------------------------------|
| No pretreatment         | 0                    | 0.00                           | 0.00                              | 0.00                                  | 0.00                          | 0.00                                 | 0.00                                     | 0.00                          |
| 140°C 192 min Batch LHW | 4919                 | 0.22                           | 0.00                              | 0.27                                  | 0.45                          | 4.54                                 | 5.75                                     | 5.11                          |
| 180°C 12 min Batch LHW  | 4924                 | 0.20                           | 0.00                              | 0.52                                  | 0.62                          | 9.16                                 | 6.18                                     | 7.39                          |
| 140°C 192 min FT LHW    | 396047               | N/A                            | N/A                               | N/A                                   | N/A                           | N/A                                  | 17.78                                    | 8.58                          |
| 180°C 12 min FT LHW     | 36047                | 0.10                           | 0.00                              | 1.19                                  | 0.44                          | 13.80                                | 18.42                                    | 7.73                          |
| 140°C 192 min Batch EDA | 4927                 | 0.90                           | 1.01                              | 0.00                                  | 9.23                          | 2.90                                 | 6.24                                     | 7.13                          |
| 180°C 12 min Batch EDA  | 4936                 | 1.70                           | 1.56                              | 0.00                                  | 13.43                         | 1.42                                 | 9.33                                     | 6.97                          |
| 140°C 192 min FT EDA    | 396049               | N/A                            | N/A                               | N/A                                   | N/A                           | N/A                                  | 18.79                                    | 8.58                          |
| 180°C 12 min FT EDA     | 36050                | 1.47                           | 1.83                              | 0.00                                  | 4.61                          | 10.62                                | 19.27                                    | 8.58                          |

Table 3. Materials in stream C (in kilograms)

| Condition               | Mass of Solid (dry basis) | Glucan in Pretreated Solid | Xylan in Pretreated Solid | Lignin in Pretreated Solid | Others in Pretreated Solid |
|-------------------------|---------------------------|----------------------------|---------------------------|----------------------------|----------------------------|
| No pretreatment         | 100                       | 45.75                      | 17.58                     | 28.10                      | 8.57                       |
| 140°C 192 min Batch LHW | 81                        | 43.66                      | 11.98                     | 22.36                      | 2.89                       |
| 180°C 12 min Batch LHW  | 76                        | 45.74                      | 7.97                      | 21.93                      | 0.61                       |
| 140°C 192 min FT LHW    | 53                        | 38.52                      | 4.08                      | 10.32                      | 0.00                       |
| 180°C 12 min FT LHW     | 53                        | 41.05                      | 2.45                      | 9.69                       | 0.27                       |
| 140°C 192 min Batch EDA | 73                        | 44.99                      | 5.58                      | 21.87                      | 0.87                       |
| 180°C 12 min Batch EDA  | 64                        | 42.39                      | 1.88                      | 18.77                      | 1.03                       |
| 140°C 192 min FT EDA    | 51                        | 39.61                      | 2.34                      | 9.31                       | 0.00                       |
| 180°C 12 min FT EDA     | 50                        | 40.05                      | 1.04                      | 8.83                       | 0.00                       |

Table 4. Materials in stream D (in kilograms)

| <b>Condition</b>        | <b>Enzyme to Stage 2</b> | <b>Water to Stage 2</b> | <b>Citrate Buffer to Stage 2</b> | <b>Antibiotic to Stage 2</b> | <b>Total Reaction Mass of EH</b> |
|-------------------------|--------------------------|-------------------------|----------------------------------|------------------------------|----------------------------------|
| No pretreatment         | 4.58                     | 4410                    | 59.03                            | 0.92                         | 4575                             |
| 140°C 192 min Batch LHW | 4.58                     | 4223                    | 56.33                            | 0.87                         | 4366                             |
| 180°C 12 min Batch LHW  | 4.58                     | 4433                    | 59.02                            | 0.91                         | 4574                             |
| 140°C 192 min FT LHW    | 4.58                     | 3744                    | 49.70                            | 0.77                         | 3852                             |
| 180°C 12 min FT LHW     | 4.58                     | 3993                    | 52.96                            | 0.82                         | 4105                             |
| 140°C 192 min Batch EDA | 4.58                     | 4362                    | 58.05                            | 0.90                         | 4499                             |
| 180°C 12 min Batch EDA  | 4.58                     | 4115                    | 54.70                            | 0.85                         | 4239                             |
| 140°C 192 min FT EDA    | 4.58                     | 3853                    | 51.10                            | 0.79                         | 3961                             |
| 180°C 12 min FT EDA     | 4.58                     | 3898                    | 51.67                            | 0.80                         | 4005                             |

Table 5. Materials in stream E (in kilograms)

| <b>Condition</b>        | <b>Total Mass of EH Liquor</b> | <b>Glucan in EH liquor</b> | <b>Xylan in EH Liquor</b> | <b>Buffer in EH Liquor</b> | <b>Antibiotic in EH Liquor</b> |
|-------------------------|--------------------------------|----------------------------|---------------------------|----------------------------|--------------------------------|
| No pretreatment         | 4477                           | 5.28                       | 1.07                      | 59.03                      | 0.92                           |
| 140°C 192 min Batch LHW | 4295                           | 11.75                      | 2.78                      | 56.33                      | 0.87                           |
| 180°C 12 min Batch LHW  | 4520                           | 22.82                      | 4.30                      | 59.02                      | 0.91                           |
| 140°C 192 min FT LHW    | 3816                           | 19.78                      | 2.19                      | 49.70                      | 0.77                           |
| 180°C 12 min FT LHW     | 4090                           | 41.05                      | 2.16                      | 52.96                      | 0.82                           |
| 140°C 192 min Batch EDA | 4445                           | 21.89                      | 2.06                      | 58.05                      | 0.90                           |
| 180°C 12 min Batch EDA  | 4215                           | 42.39                      | 1.77                      | 54.70                      | 0.85                           |
| 140°C 192 min FT EDA    | 3940                           | 32.93                      | 1.48                      | 51.10                      | 0.79                           |
| 180°C 12 min FT EDA     | 3992                           | 40.05                      | 1.00                      | 51.67                      | 0.80                           |

Table 6. Materials in stream F (in kilograms)

| <b>Condition</b>           | <b>Total Mass of Residue</b> | <b>Glucan in Residue</b> | <b>Xylan in Residue</b> | <b>Lignin in Residue</b> | <b>Others in Residue</b> | <b>Enzyme in Residue</b> |
|----------------------------|------------------------------|--------------------------|-------------------------|--------------------------|--------------------------|--------------------------|
| No pretreatment            | 98                           | 40.47                    | 16.51                   | 28.10                    | 8.57                     | 4.58                     |
| 140°C 192 min<br>Batch LHW | 71                           | 31.90                    | 9.20                    | 22.36                    | 2.89                     | 4.58                     |
| 180°C 12 min<br>Batch LHW  | 54                           | 22.92                    | 3.67                    | 21.93                    | 0.61                     | 4.58                     |
| 140°C 192 min FT<br>LHW    | 35                           | 18.74                    | 1.89                    | 10.32                    | 0.00                     | 4.58                     |
| 180°C 12 min FT<br>LHW     | 15                           | 0.00                     | 0.29                    | 9.69                     | 0.27                     | 4.58                     |
| 140°C 192 min<br>Batch EDA | 54                           | 23.10                    | 3.52                    | 21.87                    | 0.87                     | 4.58                     |
| 180°C 12 min<br>Batch EDA  | 24                           | 0.00                     | 0.11                    | 18.77                    | 1.03                     | 4.58                     |
| 140°C 192 min FT<br>EDA    | 21                           | 6.67                     | 0.87                    | 9.31                     | 0.00                     | 4.58                     |
| 180°C 12 min FT<br>EDA     | 13                           | 0.00                     | 0.04                    | 8.83                     | 0.00                     | 4.58                     |
